# Supplementary material for: Toward in silico modeling of palladium–hydrogen–carbon nanohorn nanocomposites
Source: Royal Society of Chemistry journal article supplement (doi:10.1039/c4cp01345j), 2014-01-01
Supplement: c4cp01345j1.pdf [file c4cp01345j1.pdf]

# Toward In-Silico Modeling of Palladium- Hydrogen-Carbon Nanohorn Nanocomposites

*Piotr Kowalczyk<sup>\*1</sup>, Artur P. Terzyk<sup>2</sup>, Piotr A. Gauden<sup>2</sup>, Sylwester  
Furmaniak<sup>2</sup> and Katsumi Kaneko<sup>3</sup>*

[1] Nanochemistry Research Institute, Department of Chemistry, Curtin  
University of Technology, P.O. Box U1987, Perth, 6845 Western  
Australia, Australia

[2] Department of Chemistry, Physicochemistry of Carbon Materials  
Research Group, N. Copernicus University, Gagarin St. 7, 87-100 Torun,  
Poland

[3] Center for Energy and Environmental Science, Shinshu University,  
4-17-1 Wakasato, Nagano 380-8553, Japan

Corresponding author footnote (\*To whom correspondence should be addressed):

Dr Piotr Kowalczyk

Tel: +61 8 9266 7800

E-mail: [Piotr.Kowalczyk@curtin.edu.au](mailto:Piotr.Kowalczyk@curtin.edu.au)

Number of pages: 3

Number of Figures: 1

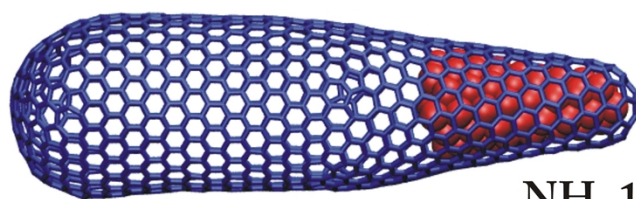

NH\_1.71\_03.0\_19.2

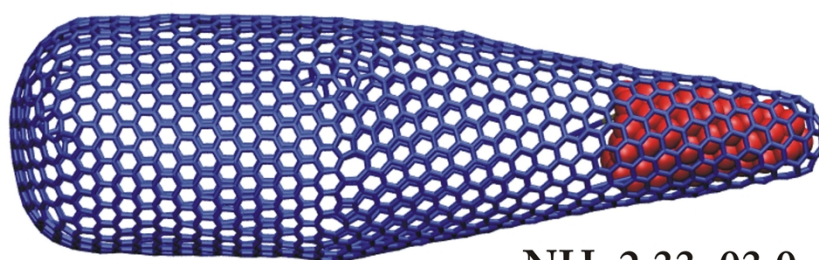

NH\_2.33\_03.0\_19.2

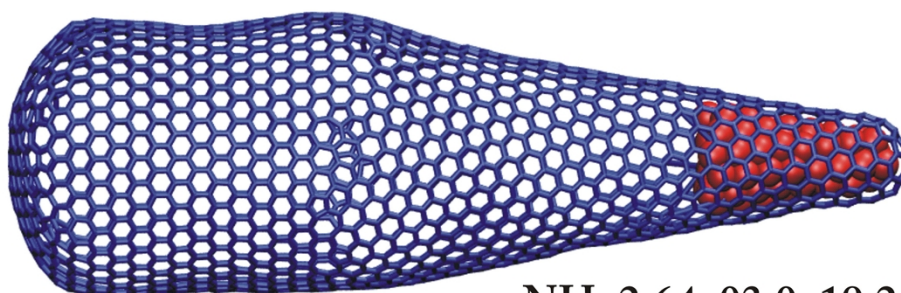

NH\_2.64\_03.0\_19.2

**Figure 1S.** Snapshots of Pd<sub>81</sub>-SWCNH nanocomposites (top to the bottom: NH\_1.71\_03.0\_19.2, NH\_2.33\_03.0\_19.2 and NH\_2.64\_03.0\_19.2 nanohorn<sup>1</sup>) collected from temperature-quenched Monte Carlo simulations. Red spheres present the most stable morphologies of Pd<sub>81</sub> clusters confined in SWCNHs.

## References

(1) S. Furmaniak, A. P. Terzyk, K. Kaneko, P. A. Gauden, Kowalczyk P., T. Itoh, The first atomistic modelling-aided reproduction of morphologically defective single-walled carbon nanohorns, *Phys. Chem. Chem. Phys.*, 2013, **15**, 1232-1240.
